# Supplementary material for: New Insights on the Nutrition Status and Antioxidant Capacity in Multiple Sclerosis Patients
Source: PubMed Central journal article supplement (PMC6413226; doi:10.3390/nu11020427), 2019-02-18
Supplement: nutrients-11-00427-s001.pdf [file nutrients-11-00427-s001.pdf]

**Table S1.** Comparison of routine blood test values between different MS treatments.

| Variables                 | Interferon Beta | Fingolimod  | Other Medication | MS Untreated | <i>p</i> * |
|---------------------------|-----------------|-------------|------------------|--------------|------------|
| Iron (µg/dL)              | 74.3±26.5       | 62.8±20.8   | 49.3±56.0        | 54.9±25.2    | 0.167      |
| Ferritin (ng/mL)          | 92.9±81.5       | 46.6±20.2   | 98.4±72.8        | 49.1±57.2    | 0.113      |
| Vitamin B12 (pg/mL)       | 416.1±175.6     | 403.6±157.3 | 496.6±196.9      | 488.7±167.6  | 0.225      |
| Magnesium (mg %)          | 2.1±0.1         | 2.1±0.1     | 2.1±0.1          | 2.2±0.1      | 0.502      |
| Folic acid (ng/mL)        | 9.5±5.2         | 11.7±4.7    | 7.4±5.0          | 12.7±4.7     | 0.064      |
| Triglycerides (mg/dL)     | 108.2±57.3      | 123.4±57.1  | 90.7±35.4        | 121.8±106.6  | 0.664      |
| Total Cholesterol (mg/dL) | 172.8±26.8      | 175.8±27.3  | 184.3±30.1       | 183.8±47.0   | 0.775      |
| HDL (mg/dL)               | 46.5±8.4        | 50.8±20.4   | 53.8±13.4        | 46.4±12.7    | 0.985      |
| LDL (mg/dL)               | 103.3±22.8      | 102.7±17.5  | 116.0±26.7       | 122.1±40.2   | 0.449      |
| Albumin (g %)             | 4.1±0.4         | 4.1±0.3     | 3.9±0.5          | 4.0±0.7      | 0.941      |

Kruskal–Wallis non-parametric test was used for analysis. Abbreviations: multiple sclerosis (MS), low-density lipoprotein (LDL), high-density lipoprotein (HDL). Values of routine blood tests are reported as mean ± SD. Of the 63 MS patients, there were 24 patients treated with Interferon beta (15 Rebif, 8 Avonex, and 1 Betaferon), 10 treated with Fingolimod (Gilenya), 14 treated with other medications (3 Tysabri, 3 Dimethyl Fumarate, 3 Glatiramer acetate, 3 Aubagio and 2 ocrelizumab) and 15 patients untreated at enrolment time.

**Table S2.** Comparison of fatty acid profiles from membranes of RBC between different MS treatment groups.

| Fatty acid profiles | Interferon Beta | Fingolimod | Other Medications | MS Non Treated | <i>p</i> |
|---------------------|-----------------|------------|-------------------|----------------|----------|
| C14_0               | 0.29±0.17       | 0.31±0.11  | 0.25±0.10         | 0.23±0.16      | 0.281    |
| C16_0               | 21.9±1.2        | 21.9±1.2   | 21.5±0.7          | 21.3±1.0       | 0.357    |
| C16_1n7t            | 0.05±0.03       | 0.07±0.02  | 0.06±0.04         | 0.05±0.02      | 0.058    |
| C16_1n7             | 0.27±0.20       | 0.32±0.31  | 0.26±0.13         | 0.25±0.26      | 0.648    |
| C18_0               | 16.4±2.0        | 16.2±2.3   | 16.5±1.6          | 17.5±1.8       | 0.291    |
| C18_1t              | 0.25±0.09       | 0.30±0.12  | 0.35±0.19         | 0.29±0.14      | 0.307    |
| C18_1n9             | 14.9±1.4        | 15.4±1.5   | 15.1±1.5          | 14.4±1.6       | 0.552    |
| C18_2n6tt           | 0.04±0.04       | 0.03±0.03  | 0.04±0.05         | 0.03±0.05      | 0.700    |
| C18_2n6ct           | 0.03±0.02       | 0.03±0.03  | 0.02±0.01         | 0.02±0.02      | 0.377    |
| C18_2n6tc           | 0.09±0.03       | 0.10±0.03  | 0.11±0.05         | 0.09±0.03      | 0.570    |
| C18_2n6             | 13.3±3.3        | 14.3±3.9   | 13.1±2.8          | 11.8±2.5       | 0.180    |
| C20_0               | 0.16±0.05       | 0.18±0.07  | 0.16±0.04         | 0.16±0.06      | 0.883    |
| C18_3n6             | 0.09±0.06       | 0.12±0.06  | 0.10±0.05         | 0.09±0.06      | 0.226    |
| C20_1n9             | 0.24±0.06       | 0.25±0.06  | 0.26±0.05         | 0.26±0.08      | 0.709    |
| C18_3n3             | 0.18±0.14       | 0.21±0.11  | 0.15±0.09         | 0.12±0.07      | 0.258    |
| C20_2n6             | 0.30±0.07       | 0.28±0.05  | 0.31±0.04         | 0.30±0.06      | 0.551    |
| C22_0               | 0.30±0.13       | 0.35±0.17  | 0.27±0.12         | 0.32±0.13      | 0.572    |
| C20_3n6             | 1.72±0.29       | 1.57±0.16  | 1.78±0.35         | 1.60±0.32      | 0.271    |
| C20_4n6             | 16.3±2.3        | 16.2±2.3   | 16.6±2.0          | 17.1±1.4       | 0.798    |
| C24_0               | 0.92±0.35       | 0.84±0.37  | 0.92±0.34         | 1.04±0.39      | 0.551    |
| C20_5n3             | 0.48±0.44       | 0.52±0.47  | 0.52±0.34         | 0.52±0.27      | 0.640    |
| C24_1n9             | 0.93±0.40       | 0.86±0.31  | 0.98±0.38         | 1.12±0.48      | 0.660    |
| C22_4n6             | 3.83±1.34       | 3.39±1.26  | 3.61±0.89         | 3.54±0.92      | 0.874    |
| C22_5n6             | 1.06±0.38       | 0.79±0.26  | 1.07±0.23         | 1.05±0.32      | 0.135    |

|               |           |           |           |           |       |
|---------------|-----------|-----------|-----------|-----------|-------|
| C22_5n3       | 1.88±0.40 | 1.86±0.43 | 1.89±0.48 | 2.23±0.65 | 0.354 |
| C22_6n3       | 4.07±1.39 | 3.48±0.92 | 4.13±1.80 | 4.63±1.31 | 0.278 |
| Omega-3 Index | 4.34±1.70 | 3.64±0.84 | 4.38±1.86 | 4.95±1.40 | 0.303 |

Analysis of fatty acids was performed via gas chromatography. Values are reported as mean±SD. Kruskal–Wallis non-parametric test was used for analysis. Abbreviations: Multiple sclerosis (MS); Omega-3 Index was calculated as sum of Eicosapentaenoic acid and Docosahexaenoic acid. Of the 63 MS patients, there were 24 patients treated with Interferon beta (15 Rebif, 8 Avonex, and 1 Betaferon), 10 treated with fingolimod (Gilenya), 14 treated with other medications (3 Tysabri, 3 Dimethyl Fumarate, 3 Glatiramer acetate, 3 Aubagio and 2 ocrelizumab) and 15 patients untreated at enrolment time.
